# Supplementary material for: The replication initiation determinant protein (RepID) modulates replication by recruiting CUL4 to chromatin
Source: PubMed Central journal article supplement (PMC6050238; doi:10.1038/s41467-018-05177-6), 2018-07-17
Supplement: 41467_2018_5177_MOESM3_ESM.pdf [file 41467_2018_5177_MOESM3_ESM.pdf]

## **Description of Additional Supplementary Files**

### **File Name: Supplementary Data 1**

**Description:** Quantification and statistical analysis of data collected from immunofluorescence microscopy. This data is related to Fig. 1h and Fig. 2c.
